# Supplementary material for: Oligopeptides stimulate glucagon-like peptide-1 secretion in mice through proton-coupled uptake and the calcium-sensing receptor
Source: Springer Nature journal article supplement (doi:10.1007/s00125-013-3037-3), 2013-09-17
Supplement: 125_2013_3037_MOESM1_ESM.pdf [file 125_2013_3037_MOESM1_ESM.pdf]

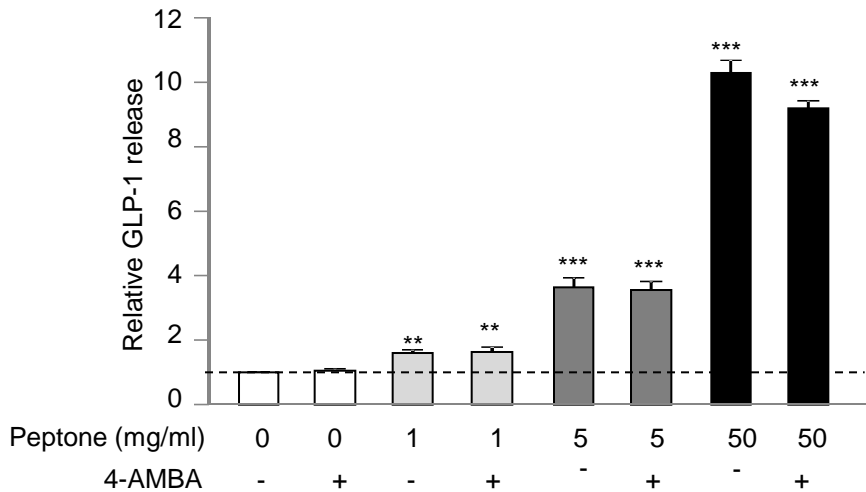

**Diakogiannaki et al. ESM Fig. 1: 4-AMBA does not affect peptone stimulated GLP-1 secretion**

Mixed primary cultures from murine colon were incubated for 2 h under control conditions (standard bath solution, n=20) or in the additional presence of 4-AMBA (5mmol/l, n=3), 1 mg/ml peptone (with (n=7) or w/o (n=7) 4-AMBA), 5 mg/ml peptone (with (n=9) or w/o (n=13) 4-AMBA) or 50 mg/ml peptone (with (n=3) or w/o (n=3) 4-AMBA), as indicated. GLP-1 secretion in each well is expressed relative to the basal secretion (control) measured in parallel on the same day and indicated by the dashed line. Data represent the mean and SEM. \*\*p<0.01, \*\*\*p<0.001 compared with their respective controls by one way ANOVA with post hoc Dunnett's test. Addition of 4-AMBA had no significant effects. The conditions with n=3 were performed on wells arising from a single culture from one mouse.
