# Supplementary material for: Oligopeptides stimulate glucagon-like peptide-1 secretion in mice through proton-coupled uptake and the calcium-sensing receptor
Source: PubMed Central journal article supplement — Diabetologia. 2013 Sep 18;56(12):2688–96. doi: 10.1007/s00125-013-3037-3 (PMC3825574; doi:10.1007/s00125-013-3037-3), 2013-09-18
Supplement: 125_2013_3037_MOESM2_ESM.pdf [file 125_2013_3037_MOESM2_ESM.pdf]

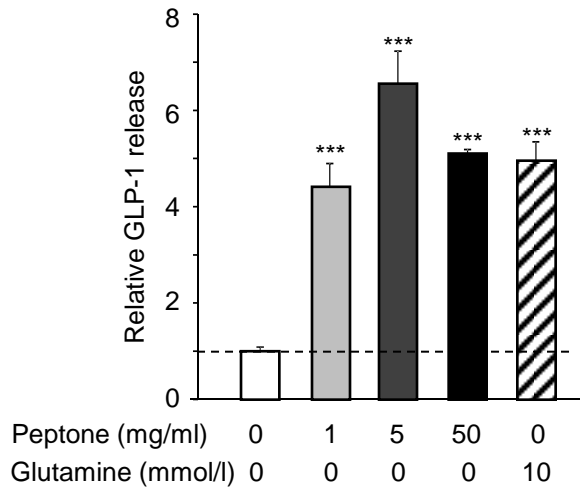

**Diakogiannaki et al. ESM Fig. 2: Peptone and glutamine stimulated GLP-1 secretion from GLUTag cells** GLUTag cells were incubated for 2 h under control conditions (standard bath solution) or in the additional presence of different concentrations of peptones or glutamine, as indicated. GLP-1 secretion assayed in the supernatant in each well is expressed relative to the basal secretion (control {supernatant}) measured in parallel on the same day and indicated by the dashed line. Data represent the mean and SEM of n=3 wells all from a single 24-well culture plate. \*\*\*p<0.001 compared with their respective controls by one way ANOVA with post hoc Dunnett's test.
